# Supplementary material for: 4-Mercaptophenyldiphenylphosphine as linker to immobilize Pd onto the surface of magnetite nanoparticles. Excellent catalytic efficiency of the system after partial linker removal
Source: Royal Society of Chemistry journal article supplement (doi:10.1039/c5ra18953e), 2015-01-01
Supplement: c5ra18953e1.pdf [file c5ra18953e1.pdf]

## Supplementary Information

### 4-mercaptophenyldiphenylphosphine as linker to immobilize Pd onto the surface of magnetite nanoparticles. Excellent catalytic efficiency of the system after partial linker removal

Anderson Guarnizo,<sup>a</sup> Inmaculada Angurell,<sup>\*a</sup> Marta D. Rossell,<sup>b</sup> Jordi Llorca,<sup>c</sup> Guillermo Muller,<sup>a</sup> Miquel Seco,<sup>a</sup> and Oriol Rossell<sup>\*a</sup>

<sup>a</sup> A. Guarnizo, Dr. I. Angurell, Dr. M. Seco, Prof. G. Muller, Prof. O. Rossell  
Departament de Química Inorgànica, Universitat de Barcelona, Martí i Franquès 1-11, 08028 Barcelona (Spain)  
e-mail: [inmaculada.angurell@qi.ub.es](mailto:inmaculada.angurell@qi.ub.es); [oriol.rossell@qi.ub.es](mailto:oriol.rossell@qi.ub.es)

<sup>b</sup> Dr. M. D. Rossell  
Electron Microscopy Center  
Empa, Swiss Federal Laboratories for Materials Science and Technology  
Überlandstrasse 129, 8600 Dübendorf (Switzerland)

<sup>c</sup> Prof. J. Llorca  
Institut de Tècniques Energètiques i Centre de Recerca en Nanoenginyeria, Universitat Politècnica de Catalunya, Diagonal 647, 08028 Barcelona (Spain)

#### Figures:

Fig. S1: <sup>31</sup>P{<sup>1</sup>H}NMR of Sdp

Fig. S2: <sup>1</sup>H NMR of Sdp

Fig. S3: <sup>13</sup>C{<sup>1</sup>H}NMR of Sdp

Fig. S4: ESI-MS(+) of Sdp

Fig. S5: TGA and DTGA of Fe<sub>3</sub>O<sub>4</sub>Sdp

Fig. S6: FT-IR spectrum of Fe<sub>3</sub>O<sub>4</sub>Sdp

Fig. S7: MALDI-TOF/TOF of Fe<sub>3</sub>O<sub>4</sub>Sdp

Fig. S8: HRTEM of Fe<sub>3</sub>O<sub>4</sub>Sdp@Pd NPs

Fig. S9 XRD of [Fe<sub>3</sub>O<sub>4</sub>Sdp@Pd]<sub>ox</sub>.

#### Tables:

Table S1: Reusability of [Fe<sub>3</sub>O<sub>4</sub>Sdp@Pd]<sub>ox</sub> catalyst in the Suzuki-Miyaura cross-coupling reaction of 4-bromonitrobenzene with phenylboronic acid.

Table S2: Reusability of [Fe<sub>3</sub>O<sub>4</sub>Sdp@Pd]<sub>ox</sub> catalyst in the hydrogenation of 4-nitrophenol.

Table S3: Reusability of [Fe<sub>3</sub>O<sub>4</sub>Sdp@Pd]<sub>ox</sub> catalyst in the hydrogenation of styrene.

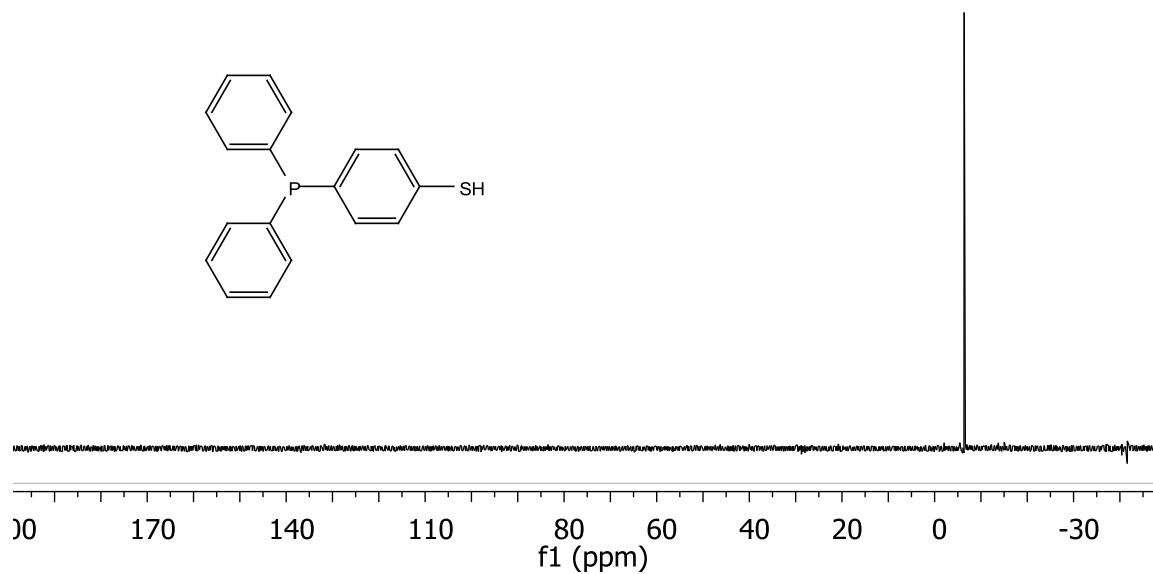

**Fig. S1**  $^{31}\text{P}\{^1\text{H}\}$  NMR of **Sdp** in  $\text{CDCl}_3$ .

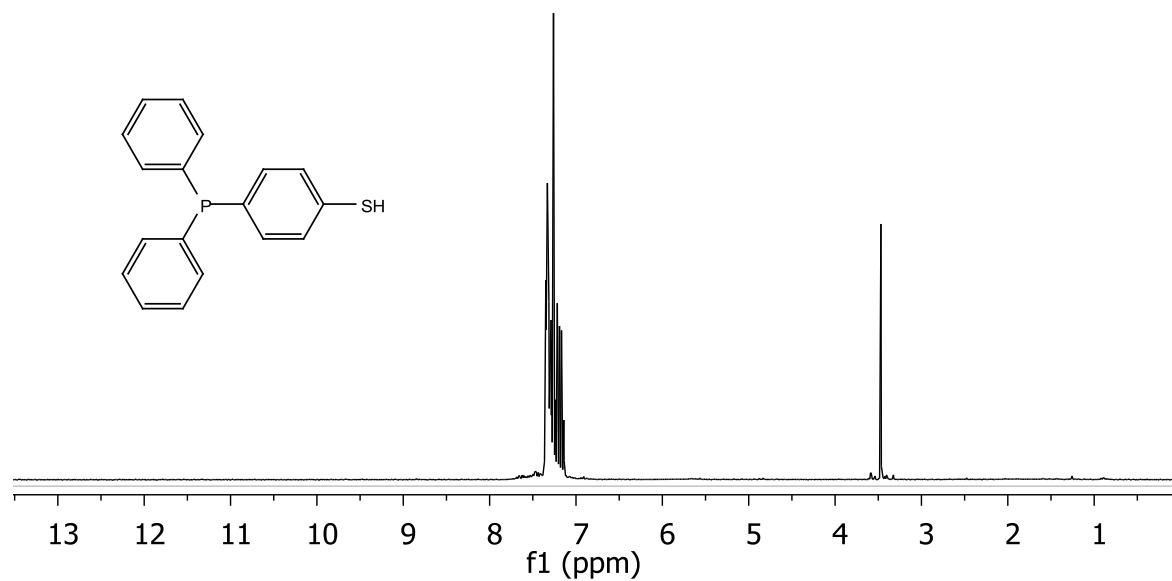

**Fig. S2**  $^1\text{H}$  NMR of **Sdp** in  $\text{CDCl}_3$ .

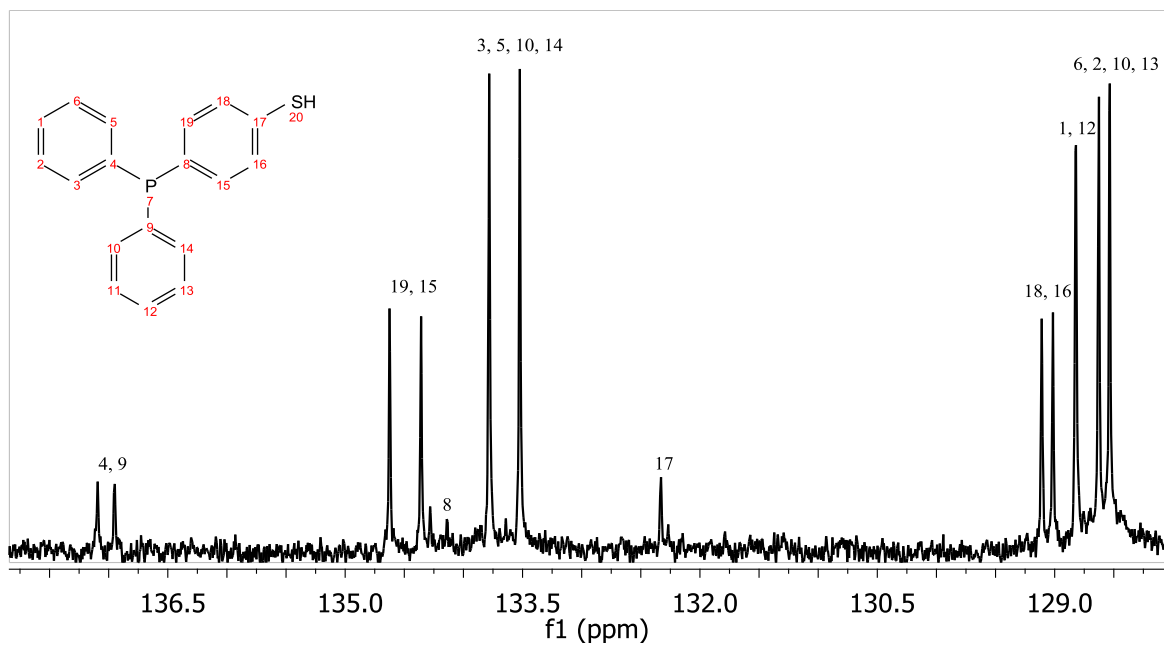

**Fig. S3**  $^{13}\text{C}\{^1\text{H}\}$ NMR of Sdp in  $\text{CDCl}_3$ .

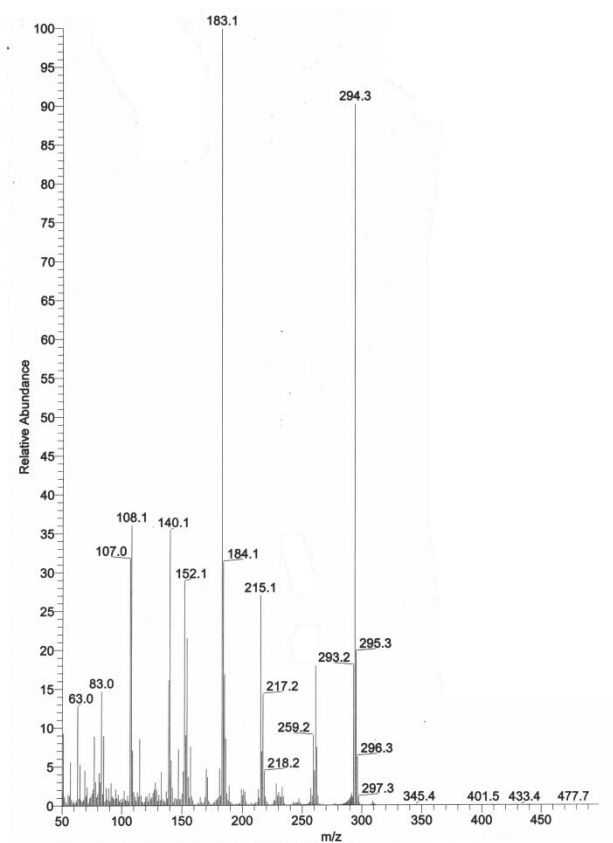

**Fig. S4** ESI-MS(+) of Sdp.

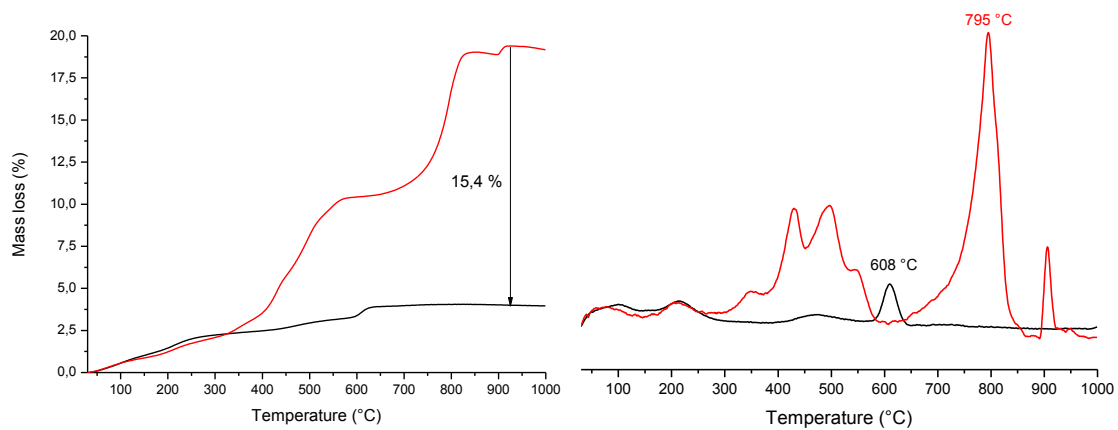

**Fig. S5** Left: TGA of Fe<sub>3</sub>O<sub>4</sub>Sdp and right, its DTGA. Black: Fe<sub>3</sub>O<sub>4</sub>, Red: Fe<sub>3</sub>O<sub>4</sub>Sdp.

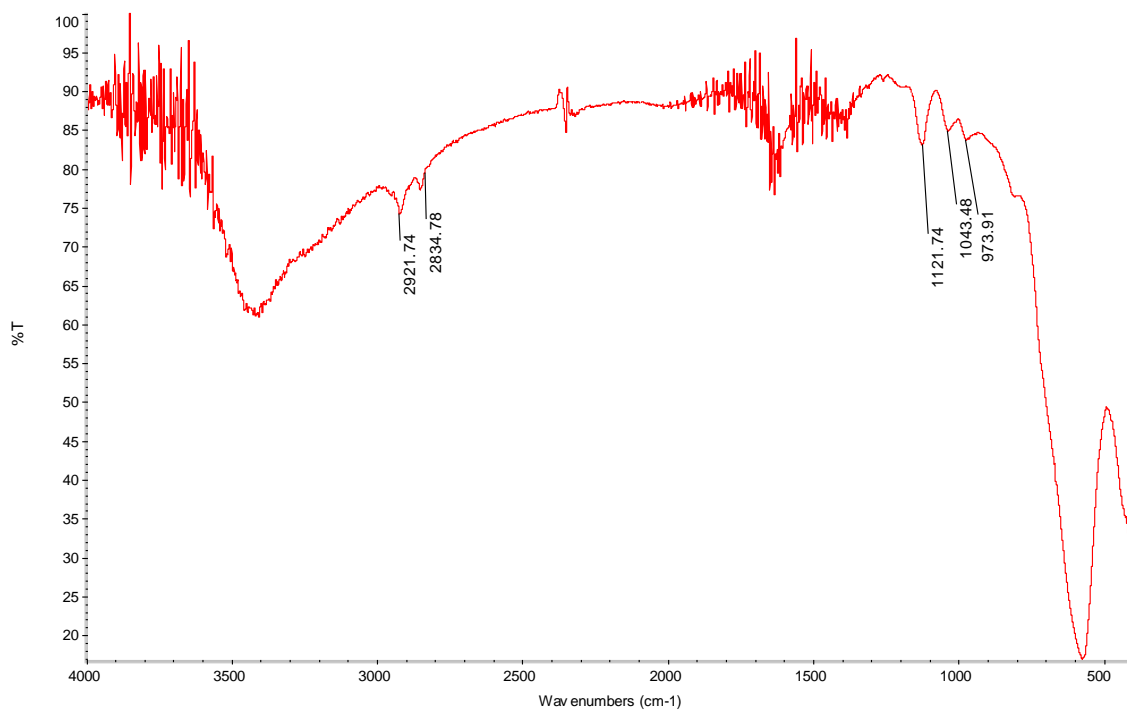

**Fig. S6** FT-IR spectrum of Fe<sub>3</sub>O<sub>4</sub>Sdp.

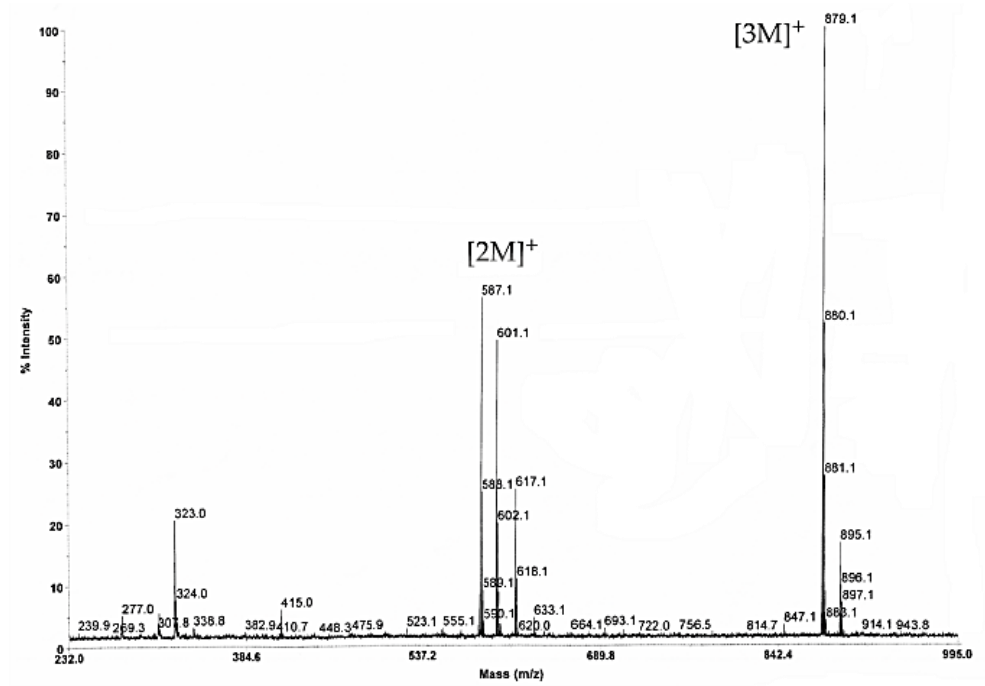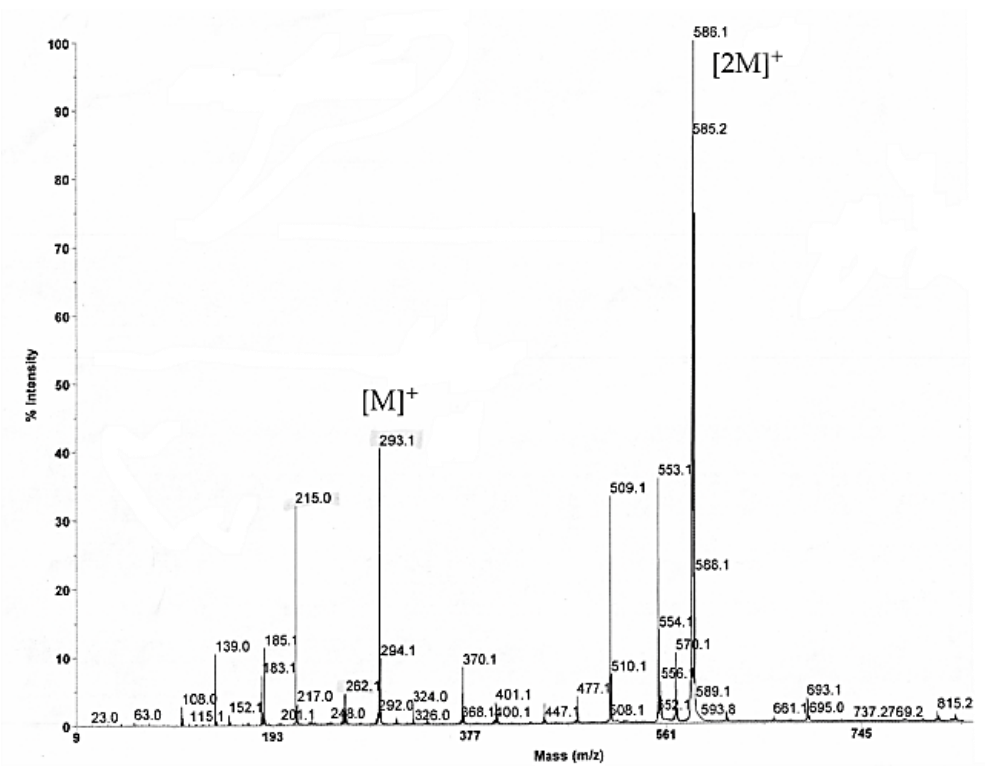

Fig. S7 MALDI-TOF/TOF of  $Fe_3O_4Sdp$ .

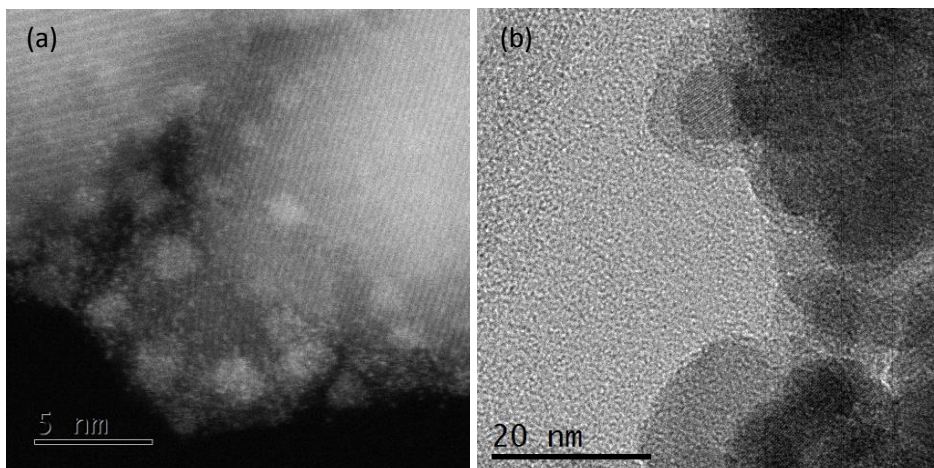

**Fig. S8** (a) HAADF-STEM of  $\text{Fe}_3\text{O}_4\text{Sdp@Pd}$  NPs showing small Pd NPs on the magnetite surface. (b) TEM of  $\text{Fe}_3\text{O}_4\text{Sdp@Pd}$  NPs showing the organic layer surrounding the magnetite.

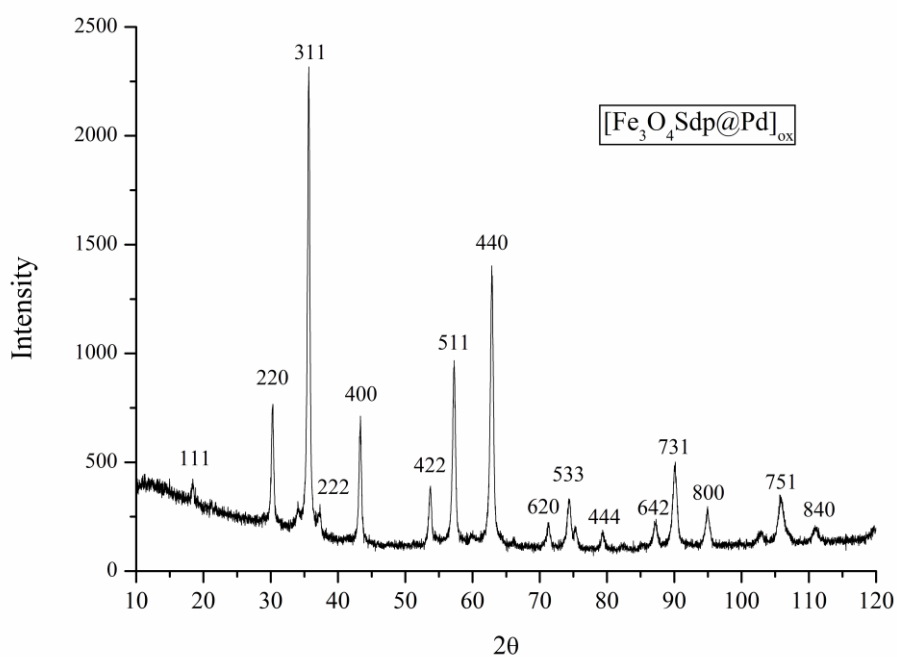

**Fig. S9** XRD of  $[\text{Fe}_3\text{O}_4\text{Sdp@Pd}]_{\text{ox}}$ .

**Table S1** Reusability of  $[\text{Fe}_3\text{O}_4\text{Sdp@Pd}]_{\text{ox}}$  catalyst in the Suzuki-Miyaura cross-coupling reaction of 4-bromonitrobenzene with phenylboronic acid.

| Cycle    | 1   | 2   | 3  | 4  |
|----------|-----|-----|----|----|
| Yield(%) | 100 | 100 | 92 | 88 |

*Reaction conditions:* 0.1 mmol BB, 0.12 mmol phenylboronic acid,  $5 \times 10^{-4}$  mmol Pd in catalyst, 4h, 0.3 mmol KOH, EtOH:H<sub>2</sub>O, 65°C

**Table S2** Reusability of  $[\text{Fe}_3\text{O}_4\text{Sdp@Pd}]_{\text{ox}}$  catalyst in the hydrogenation of 4-nitrophenol.

| Cycle    | 1   | 2   | 3   | 4   | 5  |
|----------|-----|-----|-----|-----|----|
| Yield(%) | 100 | 100 | 100 | 100 | 90 |

*Reaction conditions:* 0.22  $\mu\text{mol}$  4-nitrophenol,  $3.6 \times 10^{-3}$   $\mu\text{mol}$  Pd in catalyst, 15 min, H<sub>2</sub>O, r.t.

**Table S3** Reusability of  $[\text{Fe}_3\text{O}_4\text{Sdp@Pd}]_{\text{ox}}$  catalyst in the hydrogenation of styrene.

| Cycle    | 1   | 2   | 3   | 4   | 5  | 6  |
|----------|-----|-----|-----|-----|----|----|
| Yield(%) | 100 | 100 | 100 | 100 | 83 | 69 |

*Reaction conditions:* 3.0 mmol styrene, 1  $\mu\text{mol}$  Pd in catalyst, 1h, ethanol, 3 bar H<sub>2</sub>, r.t.
